# Supplementary material for: The effects of disruptions in ribosomal active sites and in intersubunit contacts on ribosomal degradation in Escherichia coli
Source: PubMed Central journal article supplement (PMC4289901; doi:10.1038/srep07712), 2015-01-12
Supplement: srep07712-s1.pdf [file srep07712-s1.pdf]

Supplementary Material

for

**The effects of disruptions in ribosomal active sites and in intersubunit  
contacts on ribosomal degradation in *Escherichia coli***

by

Anton Paier, Margus Leppik, Aksel Soosaar, Tanel Tenson, and Ülo

Maiväli.

Table S1. Summary of the regression analysis statistics for exponential fitting.

| Mutant        | Figure | R <sup>2</sup> | half-life<br>(minutes) | 95% CI*  |
|---------------|--------|----------------|------------------------|----------|
| wt 23S        | 1A     | 0.04           | ND                     | ND       |
| wt 16S        | 1A     | 0.00           | ND                     | ND       |
| 530U 23S      | 1B     | 0.00           | ND                     | ND       |
| 530U 16S      | 1B     | 0.00           | ND                     | ND       |
| 1492C 23S     | 1C     | 0.45           | 622                    | 391-1521 |
| 1492C 16S     | 1C     | 0.35           | 1221                   | 720-4004 |
| 2451G 23S     | 1D     | 0.00           | ND                     | ND       |
| 2451G 16S     | 1D     | 0.00           | ND                     | ND       |
| 2585A 23S     | 1E     | 0.83           | 194                    | 155-258  |
| 2585A 16S     | 1E     | 0.90           | 280                    | 237-342  |
| 1912 23S      | 2A     | 0.00           | ND                     | ND       |
| 1912 16S      | 2A     | 0.00           | ND                     | ND       |
| delta H69 23S | 2B     | 0.00           | ND                     | ND       |
| delta H69 16S | 2B     | 0.00           | ND                     | ND       |
| 1919 23S      | 2C     | 0.65           | 213                    | 161-317  |
| 1919 16S      | 2C     | 0.83           | 335                    | 296-445  |
| 1960 23S      | 2D     | 0.78           | 193                    | 157-249  |
| 1960 16S      | 2D     | 0.92           | 291                    | 251-345  |
| p33/1919 23S  | 3A     | 0.92           | 278                    | 241-330  |
| p33/1919 16S  | 3A     | 0.90           | 321                    | 278-398  |
| p33/1960 23S  | 3B     | 0.75           | 188                    | 142-278  |
| p33/1960 16S  | 3B     | 0.79           | 221                    | 172-310  |
| p33/wt 23S    | 3C     | 0.11           | ND                     | ND       |
| p33/wt 16S    | 3C     | 0.00           | ND                     | ND       |
| IF3 23S       | 4      | 0.85           | 880                    | 680-1246 |
| IF3 16S       | 4      | 0.28           | ND                     | ND       |
| 1919 SPh23S   | 5      | 0.00           | ND                     | ND       |
| 1919 SPh 16S  | 5      | 0.07           | ND                     | ND       |

95% CI – 95% confidence intervals for the half-lives calculated from the exponential fit.  
 ND – not determinable due to insufficient temporal duration of experiments

Figure S1

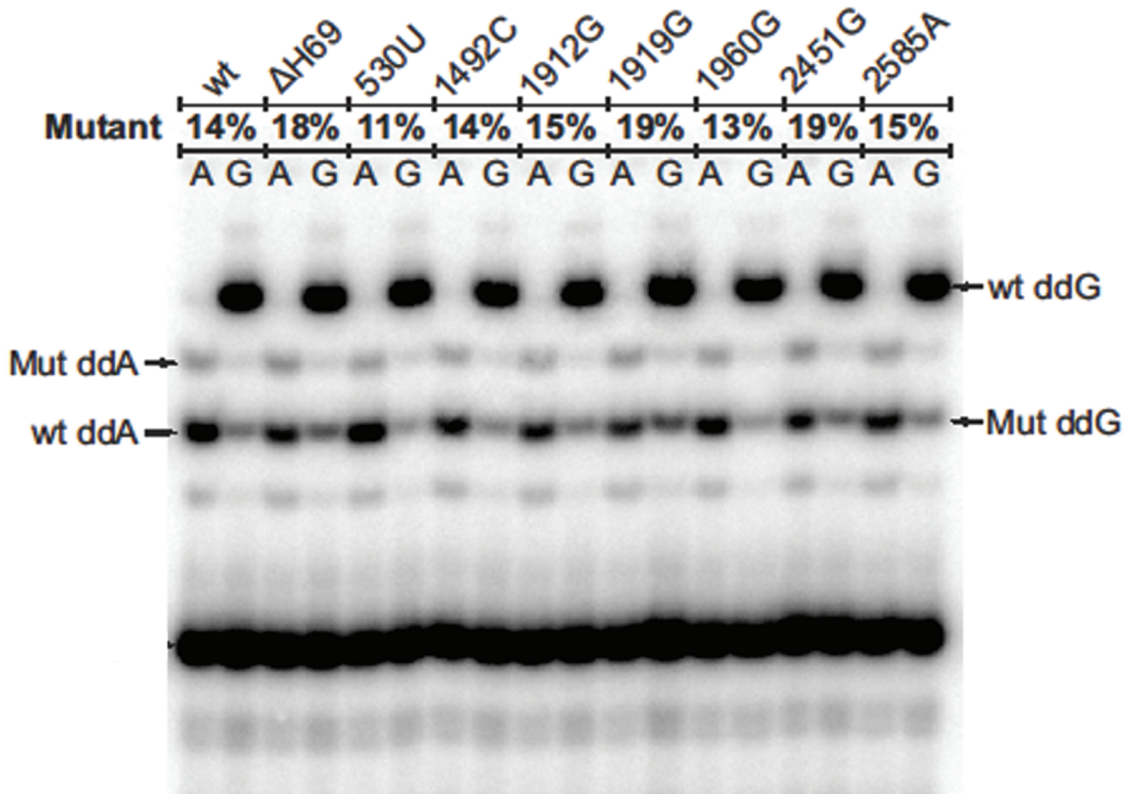

Figure S1. Analysis of 23S tag in WT and mutant rRNA by reverse transcriptase-directed primer extension was done as described in Liiv, A. and Remme, J, *J. Mol. Biol.*, 1998, vol. 276, pp.537-545. rRNA was extracted with hot phenol, chlorophorm/phenol and chlorophorm. Primer sequence was CAA AAG GTA CGC AGT CAC ACG C. Bands corresponding to tagged and untagged 23S rRNAs are labeled by arrows. Relative proportion of tagged RNA to total cellular 23S rRNA (mutant) is shown as percentages.

Figure S2

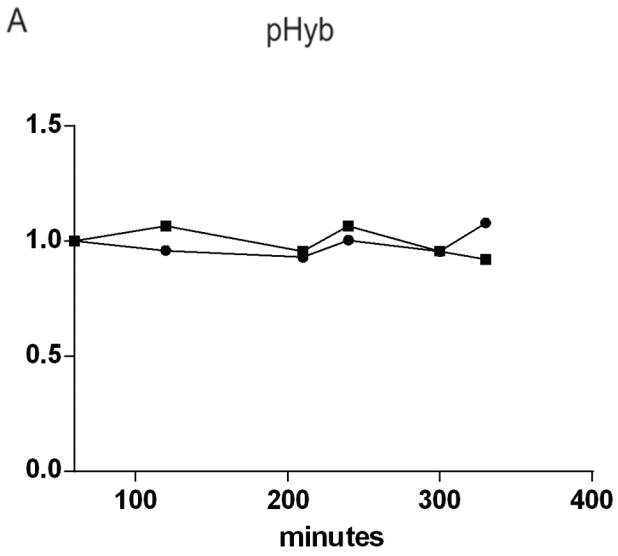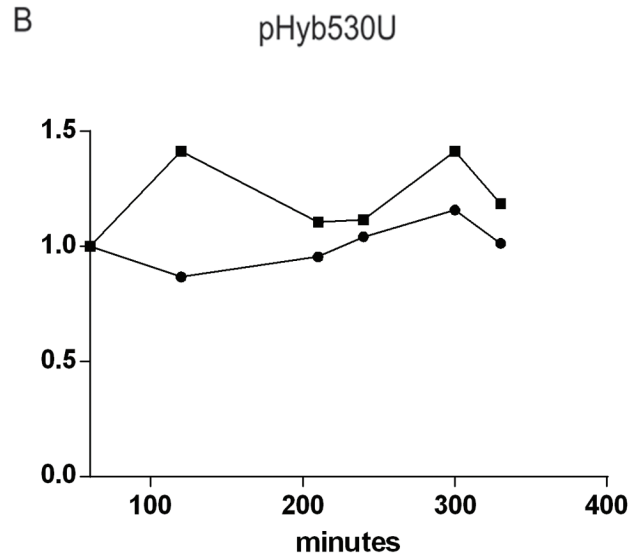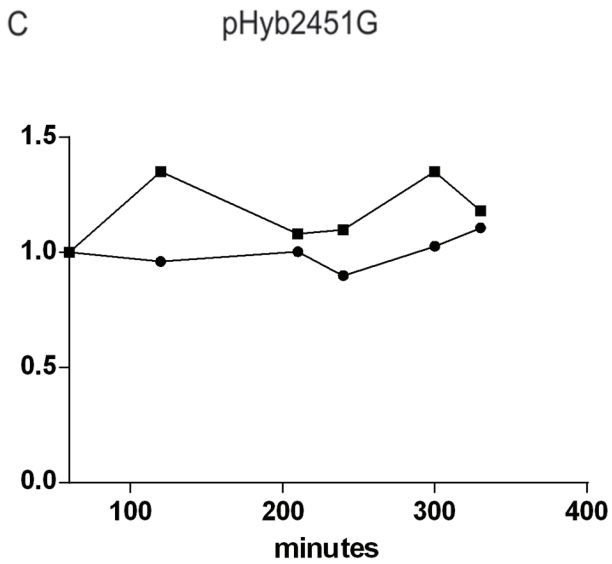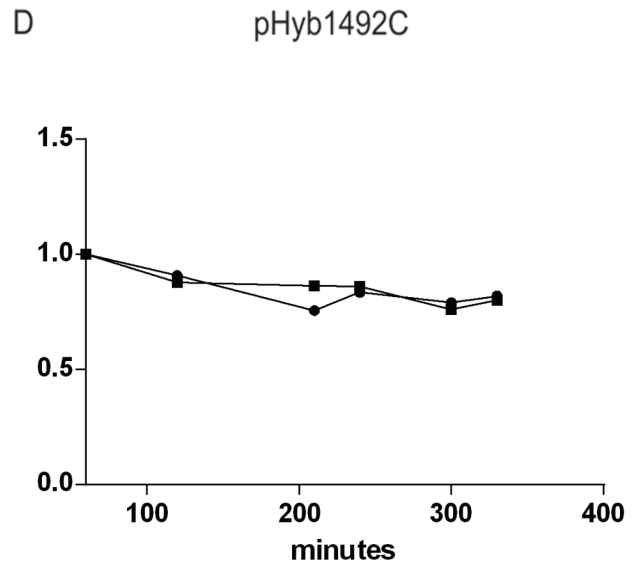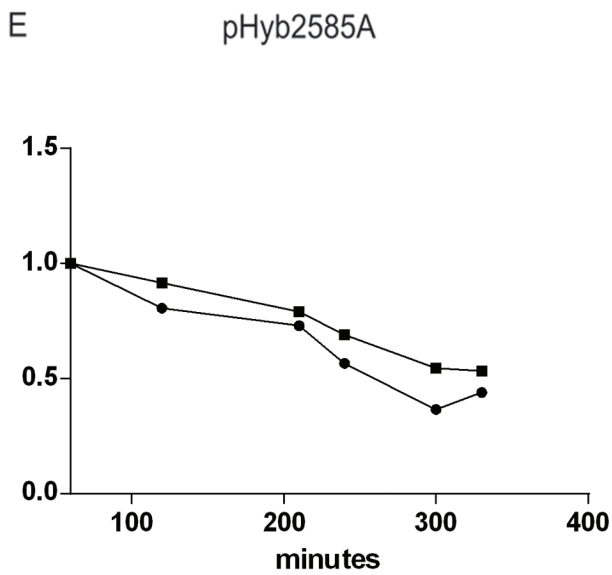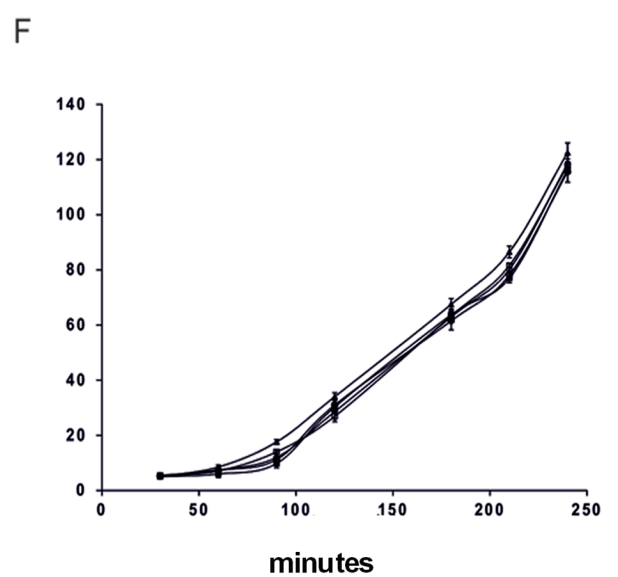



Figure S2. Representative experiments of degradation of tagged 23S rRNAs and 16S rRNAs in the presence of ribosomal active site mutants (companion to Figure 2). See Figure 2. legend for details. Circles denote 23S rRNA and squares 16S rRNA. A. pHyb, B. pHyb530U, C. pHyb2451G, D. pHyb1492C, E. pHyb2585A. Panel F shows growth of the cultures in turbidostat where growth rates are controlled by adding fresh LB medium. Y-axis shows total volumes of the cultures in ml. X-axis shows time in minutes. Triangles denote pHyb, diamonds pHyb2585A, open squares pHyb2451G, filled squares pHyb530U and circles pHyb1492C.

Figure S3

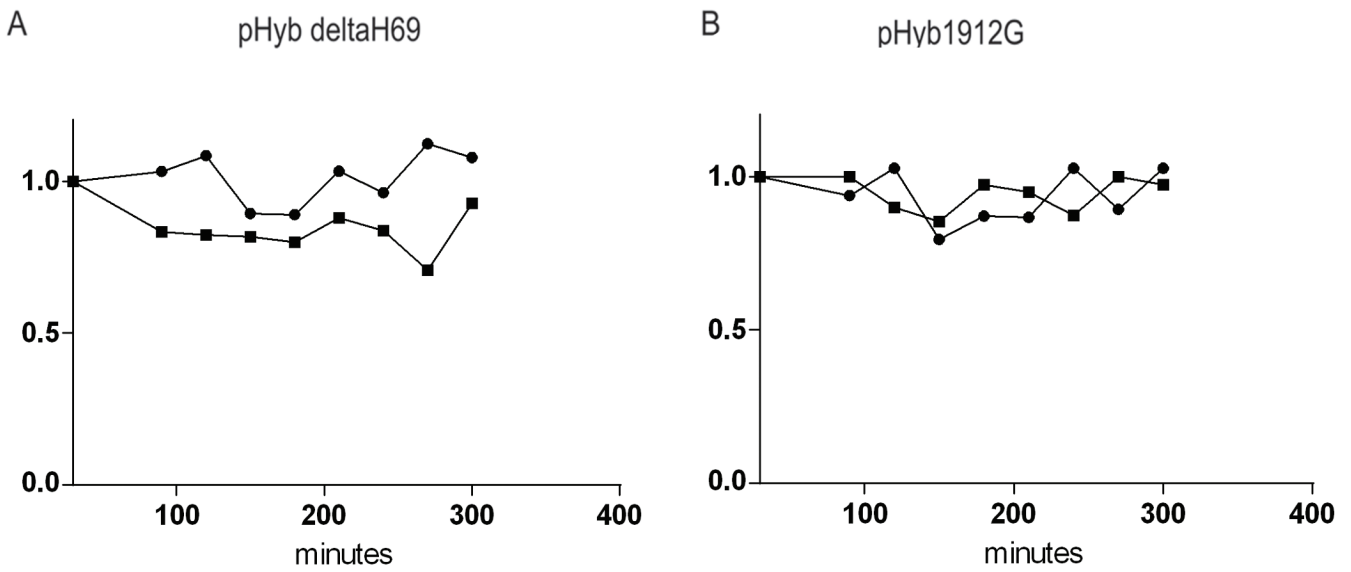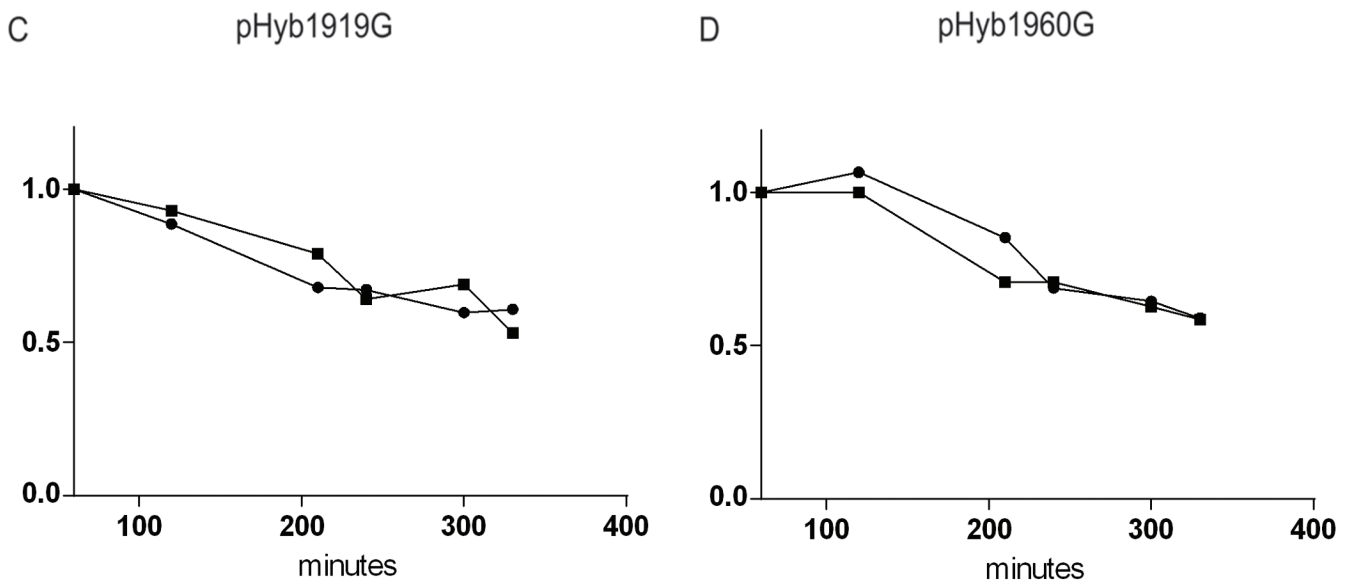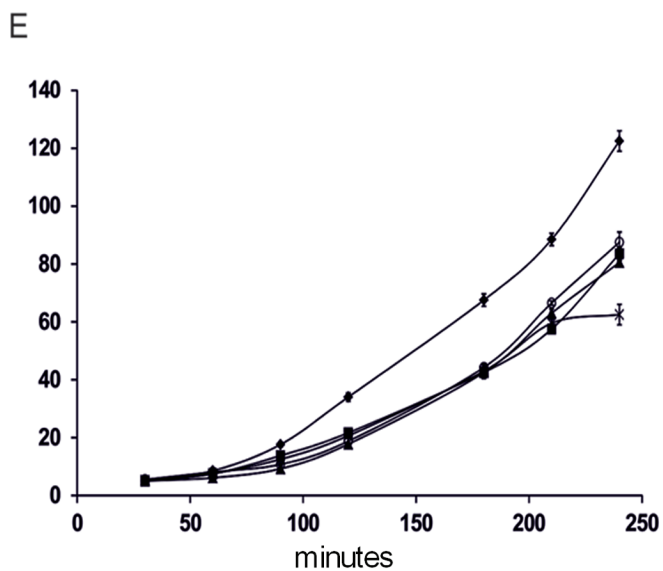

Figure S3. Representative experiments of stabilities of tagged 23S rRNAs and 16S rRNAs in the presence of ribosomal intersubunit bridge mutants (companion to Figure 3). See Figure 2. legend for details. A. pHyb $\Delta$ H69, B. pHyb1912G, C. pHyb1919G, D. pHyb1960G. Triangles denote 23S rRNA and squares 16S rRNA. Panel E shows growth of the cultures in turbidostat where growth rates are controlled by adding fresh LB medium. Y-axis shows total volumes of the cultures in mL. Diamonds denote pHyb, open circles pHyb1912G, squares pHyb1919G, triangles pHyb1960G and crosses pHyb $\Delta$ H69.

Figure S4

A

MG1655\* pHyb

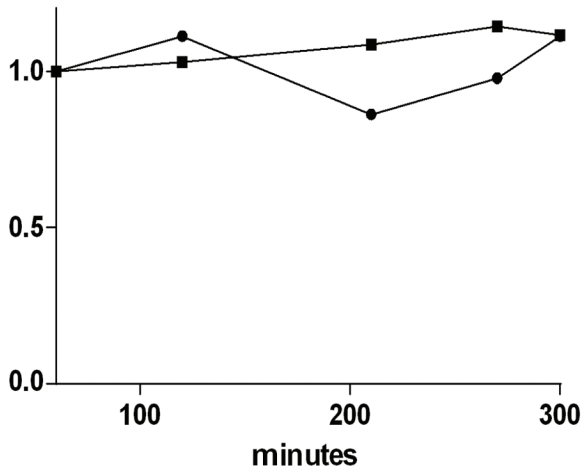

B

MG1655\* 1912G

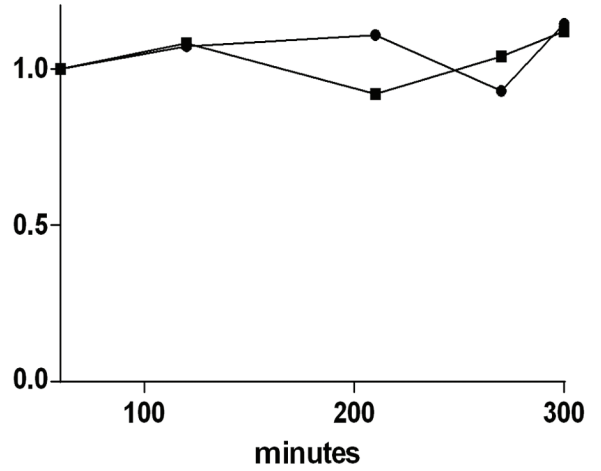

C

MG1655\* 1919G

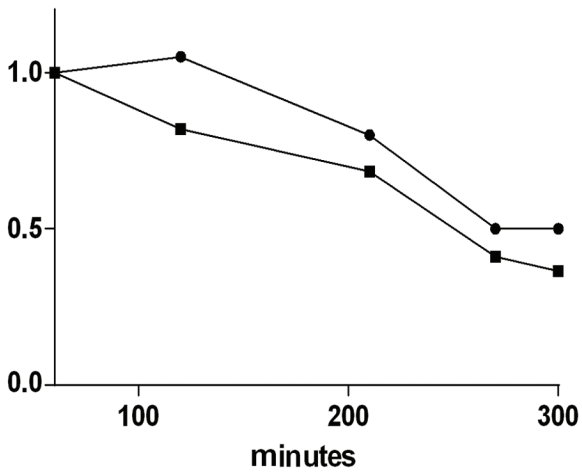

D

MG1655\* 1960G

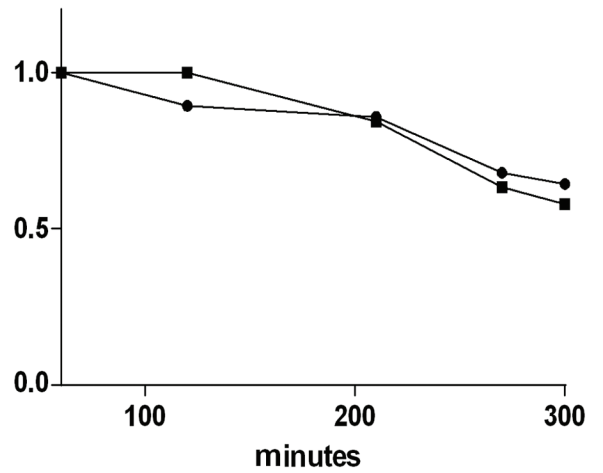

Figure S4. Degradation of tagged 23S rRNAs and 16s rRNAs in the presence of ribosomal active site mutants in MG1655\* strain containing the gene for the RNase PH protein. See Figure 2 legend for details. A. pHyb, B. pHyb1912G, C. 1919G, D. 1960G. Circles and squares denote 23S and 16S RNAs respectively.

Figure S5

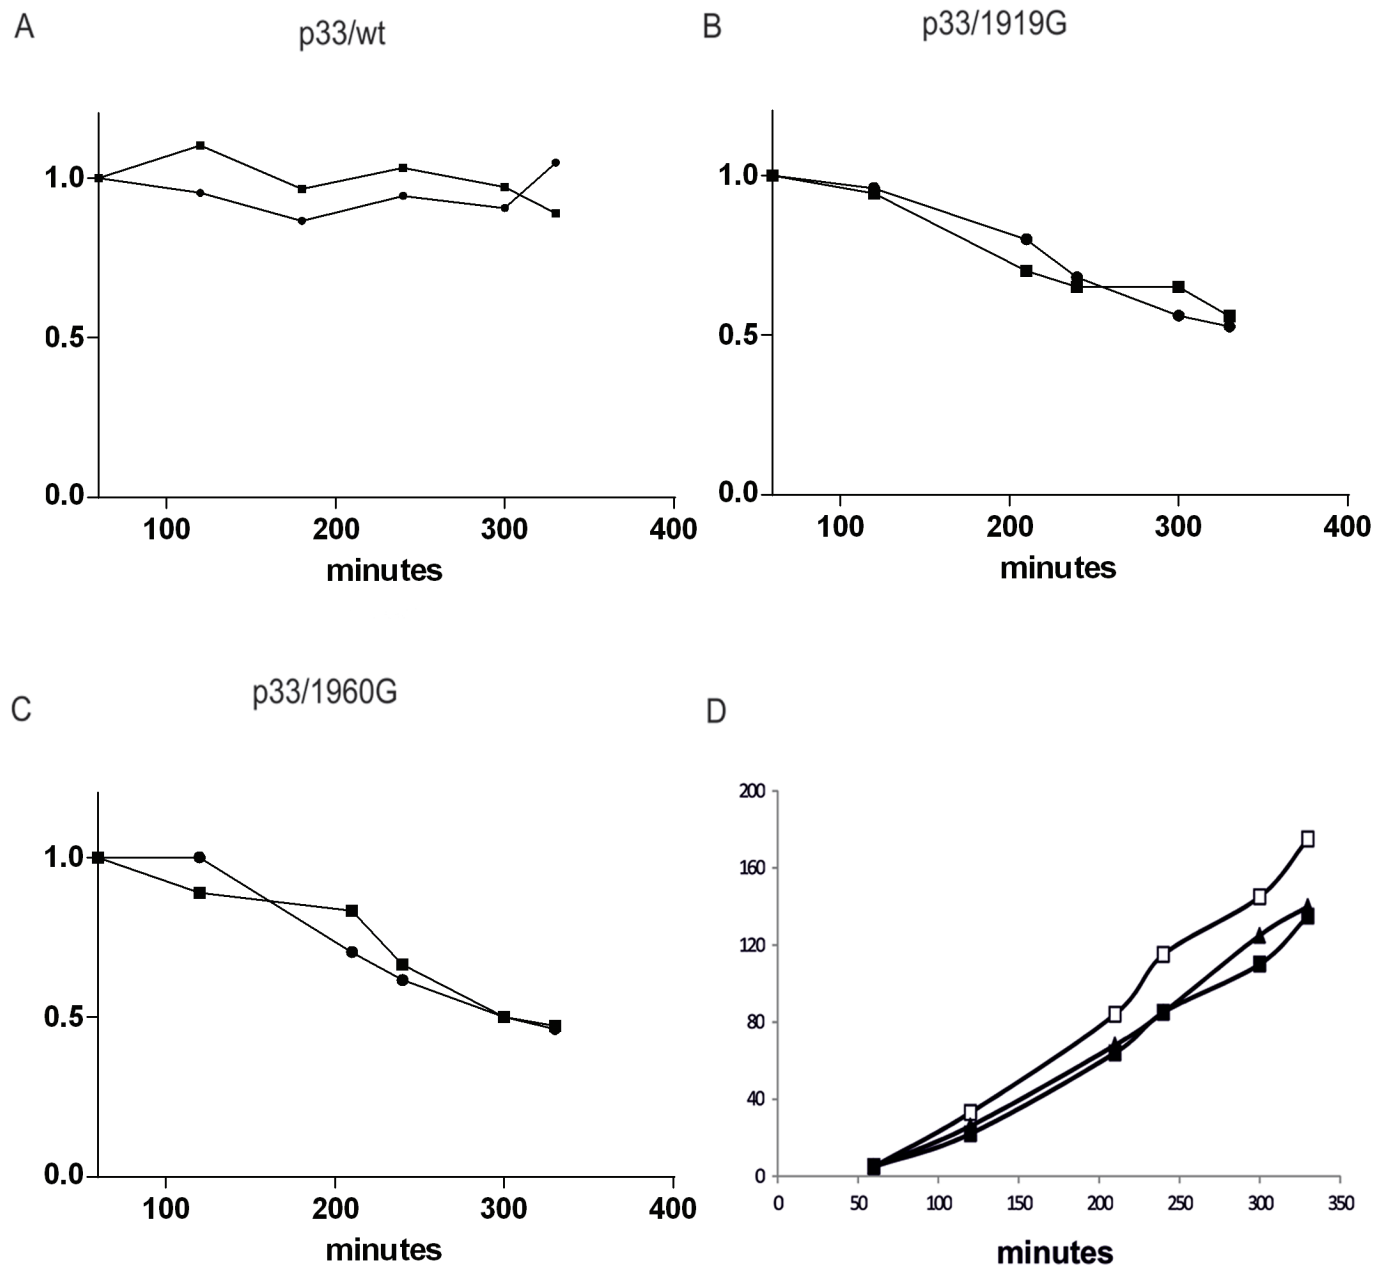

Figure S5. Expression of ribosome-destabilizing mutations in intersubunit bridges leads to degradation of “wild-type” tagged ribosomes. Results from representative experiments are shown (companion to Figure 4). A. p33/1919G is coexpressed with pHyb. B. p33/1960G is coexpressed with pHyb. C. p33/wt is coexpressed with pHyb. D. Growth of the cultures in turbidostat where growth rates are controlled by adding fresh LB medium. Y-axis shows total volumes of the cultures in mL.

Figure S6

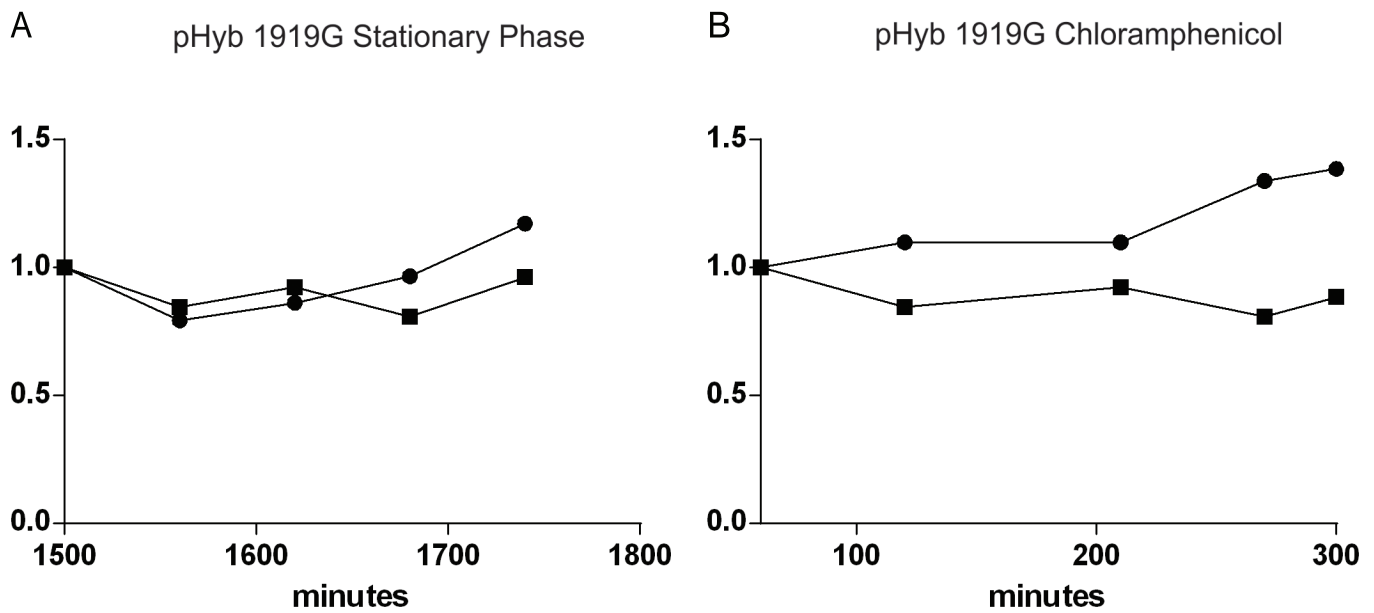

Figure S6. Ribosomes containing the destabilizing 1919G intersubunit bridge mutation are stable in the stationary growth phase. A. A representative experiment is shown. Cell cultures were grown to early stationary phase, followed by 45 minutes pulse labeling with  $H^3$ -uridine and medium-switch to depleted LB medium. After that, cultures were shaken at 37 °C in batch and indicated time points were taken. B. Ribosomes from cell culture grown with chloramphenicol (100  $\mu\text{g}/\text{ml}$ ) added 30 minutes after medium switch are stable. A representative experiment is shown.
